# Supplementary material for: Preparing liposomes through frame guided assembly with high-loading functional nucleic acids
Source: Royal Society of Chemistry journal article supplement (doi:10.1039/d3nr01412f), 2023-01-01
Supplement: d3nr01412f1.pdf [file d3nr01412f1.pdf]

## Supporting Information

### Preparing Liposomes through Frame Guided Assembly with High-Loading Functional Nucleic Acids

Wei Yuan <sup>a,b</sup>, Jiafeng Cheng <sup>c</sup>, Chenyou Zhu <sup>d</sup>, Guizhi Dong <sup>a,b</sup>, Xiaoping Zhao <sup>d</sup>,  
Siwen Meng <sup>a,b</sup>, Dongsheng Liu <sup>d</sup>, Yuanchen Dong <sup>a,b,\*</sup>

<sup>a</sup> CAS Key Laboratory of Colloid, Interface and Chemical Thermodynamics, Institute of Chemistry, Chinese  
Academy of Sciences, 100190, Beijing (China)

<sup>b</sup> University of Chinese Academy of Sciences, 100049, Beijing (China)

<sup>c</sup> Department of Chemistry, Renmin University of China, 100872, Beijing (China)

<sup>d</sup> Key Laboratory of Organic Optoelectronics & Molecular Engineering of the Ministry of Education, Department  
of Chemistry, Tsinghua University, 100084, Beijing (China)

#### 1. Materials

All chemicals were purchased from Aldrich or Alfa Aesar (Tianjing, China) and used as received unless otherwise mentioned. The DNA and RNA sequences were purchased from Xianghong Biotechnology (Beijing, China). DOPC, DOPG and PE-PEG-2000 were purchased from Avanti Lipid. Azide-modified peptide was purchased from Hefei Keshengjing Peptide Biotechnology. The MCF-7 cells (Human breast cancer cell line) and 293T•EGFP cells (Human embryonic kidney cell) were purchased from National Infrastructure of Cell Line Resource (NCR, China). The DMEM medium (Gibco, 11965092), FBS (Gibco, 10100147) and penicillin-streptomycin (Gibco, 15140122) were purchased from ThermoFisher Scientific (USA). The MTS solution (Promega G3582) was purchased from ThermoFisher Scientific. The Trizol (R0016) was purchased from Beyotime Biotechnology. The RevertAid First Strand cDNA Synthesis Kit (K1621) was purchased from ThermoFisher Scientific. The water used in all the experiments was Milli-Q deionized (18.2 MΩ.cm). TEM was performed using a HT 7700 TEM (Japan) at 100 kV. The PAGE analysis and agarose gel electrophoresis imaging was conducted on the UVP GelStudio PLUS Imaging System (USA).

## 2. Supplementary Results

### 2.1 Results of AuNPs Modified with Various Ratios of D23/D12

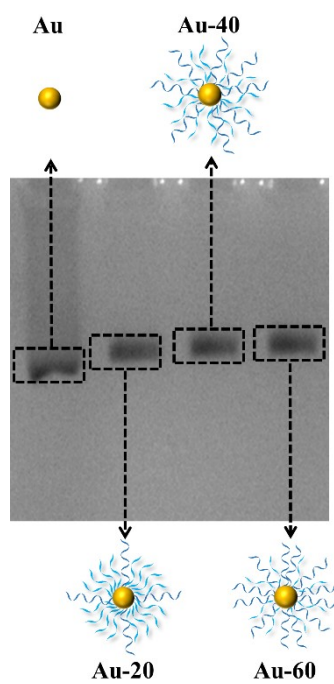

**Fig. S1** The 1% agarose gel electrophoresis result of AuNPs modified with various molar ratios of D23/D12.

## 2.2 Measurement Results of LHG Number on AuNPs

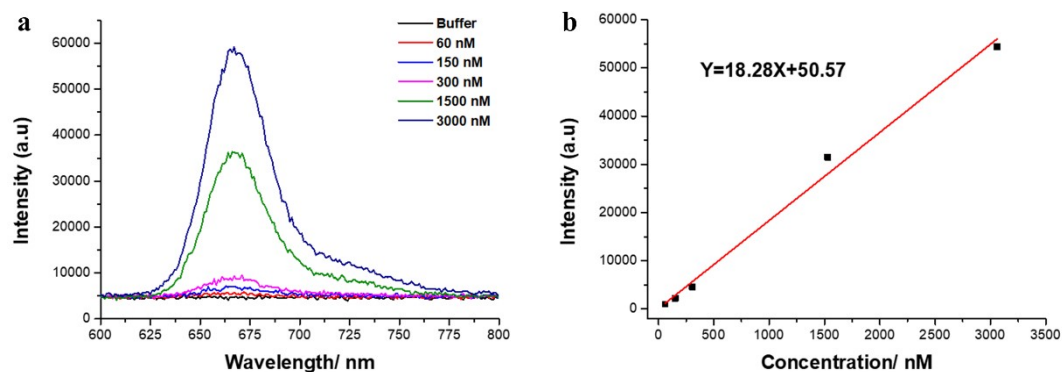

**Fig. S2** The fluorescent results of the cD23-Cy5. (a) The fluorescence spectra of the cD23-Cy5 with different concentration. (b) The calibration curve plotted based on the known concentration of probes.

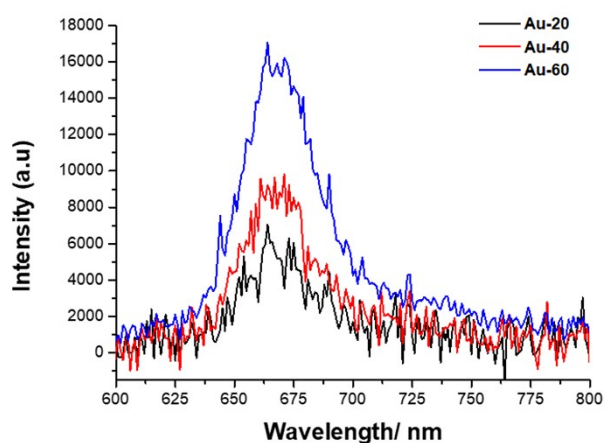

**Fig. S3** The fluorescence spectra of Cy5-cD23 released from the AuNPs with various ratios of D23 (anchoring strand) after denaturing. It could be observed that with the reducing D23 decoration on AuNPs, the decreased fluorescent density of Cy5-cD23 has been recorded, which was consistent with previous results.

**Table S1** Measurement Results of LHG Number on AuNPs

|                                                                      | <b>Au-20</b> | <b>Au-40</b> | <b>Au-60</b> |
|----------------------------------------------------------------------|--------------|--------------|--------------|
| <b>UV-Vis of AuNPs after urea-denaturing (<math>A_{450}</math>)</b>  | 1.76         | 1.59         | 1.77         |
| <b>Concentration of AuNPs (nM)</b>                                   | 12.6         | 11.4         | 12.7         |
| <b>Intensity of released Cy5 (a.u) at <math>\lambda_{667}</math></b> | 5575         | 9618         | 14802        |
| <b>Converted molar concentration of Cy5 (nM)</b>                     | 301          | 475          | 806          |
| <b>Ratios of DNA-to-AuNPs</b>                                        | 24           | 42           | 63           |

### 2.3 Results of Hybridization of Various AuNP Scaffolds with Peptide Conjugates

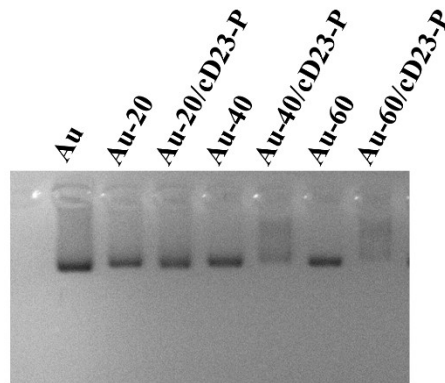

**Fig. S4** The 10% native PAGE analysis of the hybridization of the various AuNP scaffolds with peptide conjugates.

## 2.4 FGA Assembly Results of the Frames with Lower LHG Density (F-25 to F-10)

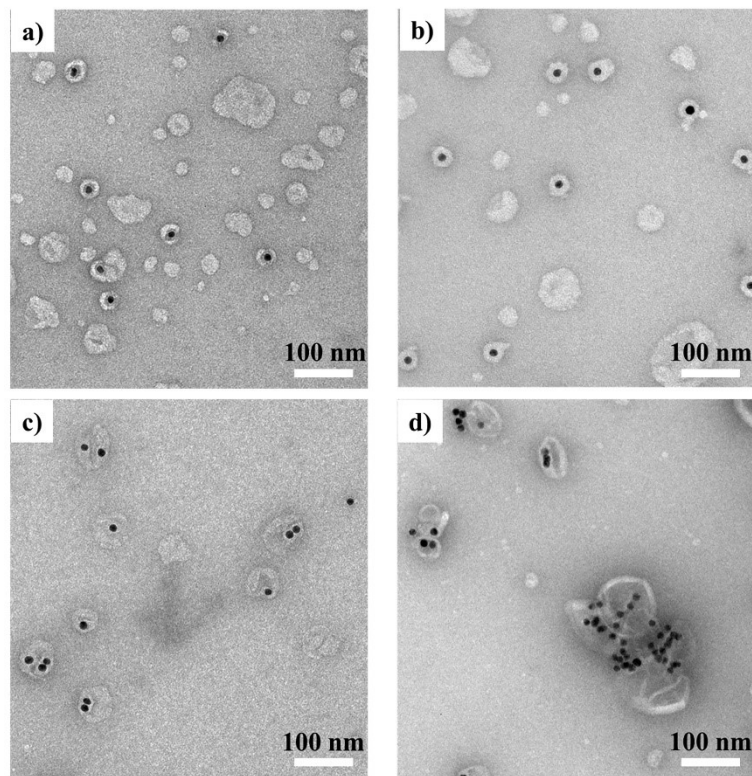

**Fig S5** The TEM images of assembly results of frames with lower LHG density under 2% OG. (a) TEM image of the assembly result of F-25. (b) TEM image of the assembly result of F-20. (c) TEM image of the assembly result of F-15. (d) TEM image of the assembly result of F-10. The scale bar is 100 nm.

## 2.5 Assembly Efficiency of Various Frames under Different OG Concentration

After dialysis, the solution was collected and allowed to stand undisturbed for a duration of 8 h. During this interval, when the frames could be well guided, the resulting well dispersed FGA liposomes. On the other hand, AuNPs containing incomplete liposomes or frames would tend to aggregate. Therefore, the assembly efficiency of the FGA could be calculated by determining the recovery of AuNPs in the supernatant and the concentration of AuNPs was estimated by calculating the absorbance value at 450 nm according to the reported literature.<sup>S1</sup>

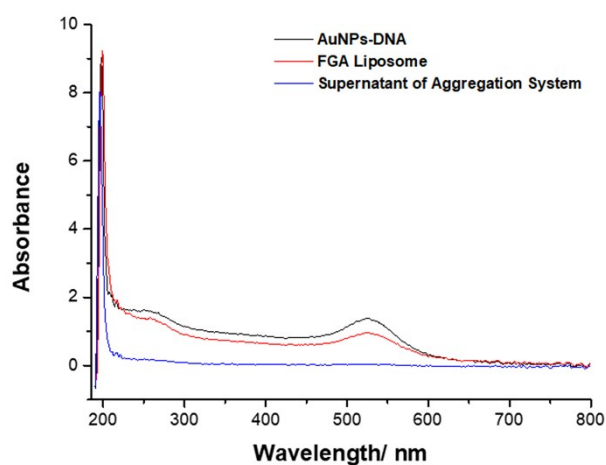

**Fig. S6** The UV spectra of AuNPs-ASO, ASO FGA Liposome and supernatant of the aggregation system.

**Table S2** Results of assembly efficiency

| Frame \ OG | 5%                 | 4%                 | 3%                 | 2%                | 1%                 |
|------------|--------------------|--------------------|--------------------|-------------------|--------------------|
| F-60       | 11%,<br>(0.08/120) | 18%,<br>(0.17/90)  | 15%,<br>(0.10/113) | 10%,<br>(0.09/90) | 13%,<br>(0.11/110) |
| F-40       | 30%,<br>(0.27/90)  | 22%,<br>(0.14/120) | 15%,<br>(0.11/114) | 13%,<br>(0.11/90) | 8%,<br>(0.06/114)  |
| F-20       | 72%,<br>(0.67/96)  | 74%,<br>(0.64/96)  | 85%,<br>(0.67/110) | 83%,<br>(0.76/90) | 79%,<br>(0.64/120) |

**Note:** The average absorbance of the AuNPs-DNA before dialysis was measured to be about 0.83 at the wavelength of 450 nm. The UV-Vis data details and the final volume of the samples after dialysis were shown in the bracket.



## 2.6 Results of Orthogonal Effects of LHG Density and Detergent Concentration

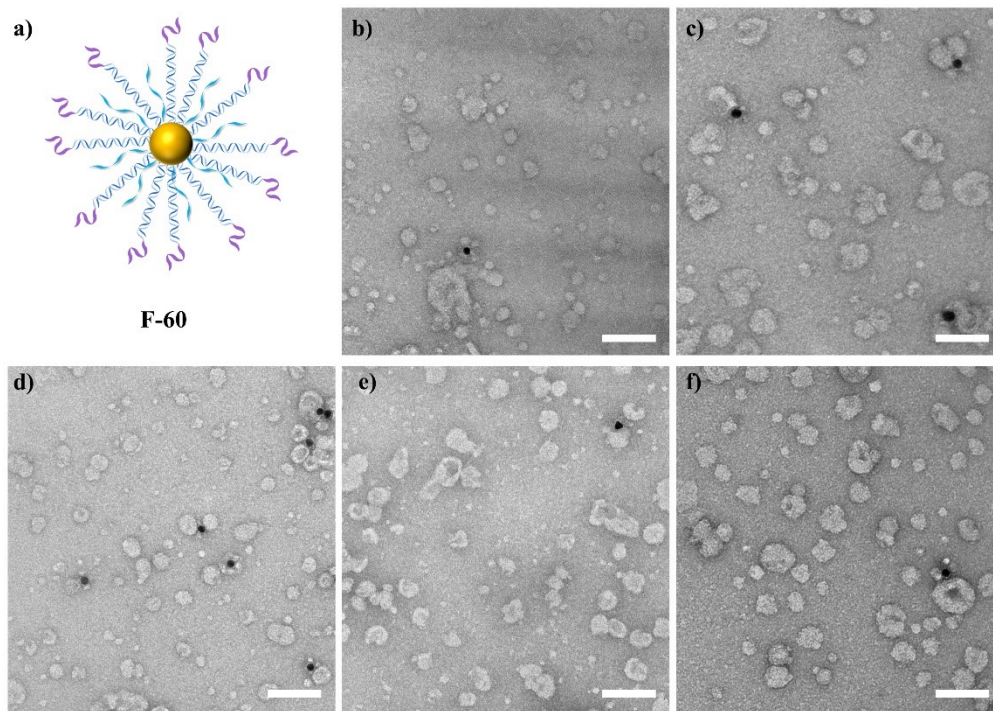

**Fig. S7a** Supplementary assembly results of F-60 under various OG concentration (5% to 1%) in **Fig. 2**.

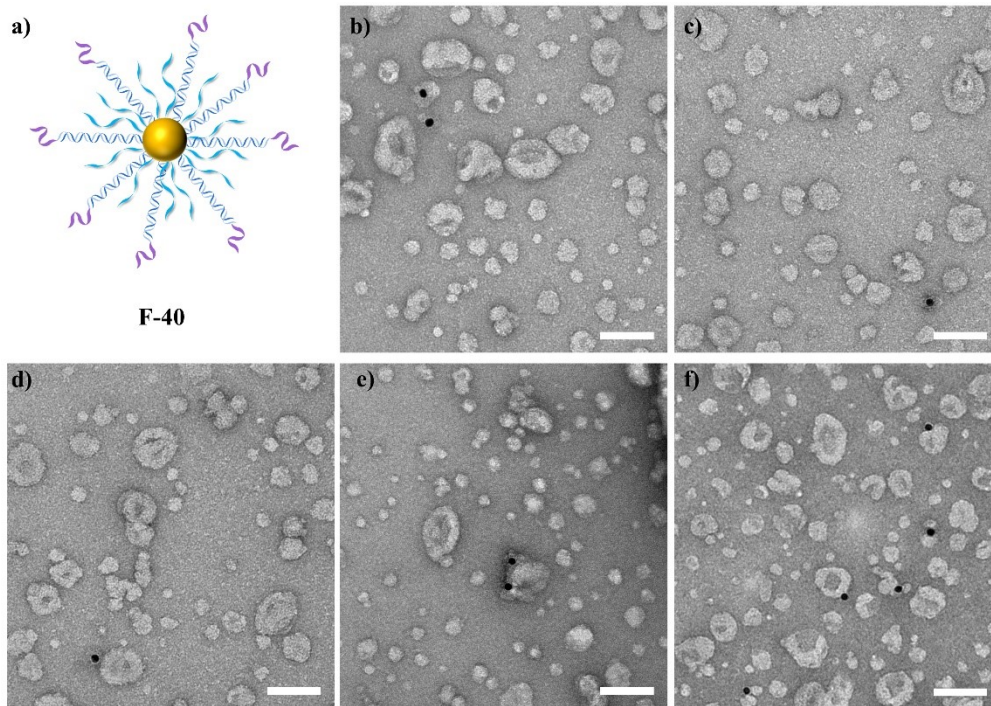

**Fig. S7b** Supplementary assembly results of F-40 under various OG concentration (5% to 1%) in **Fig. 2**.

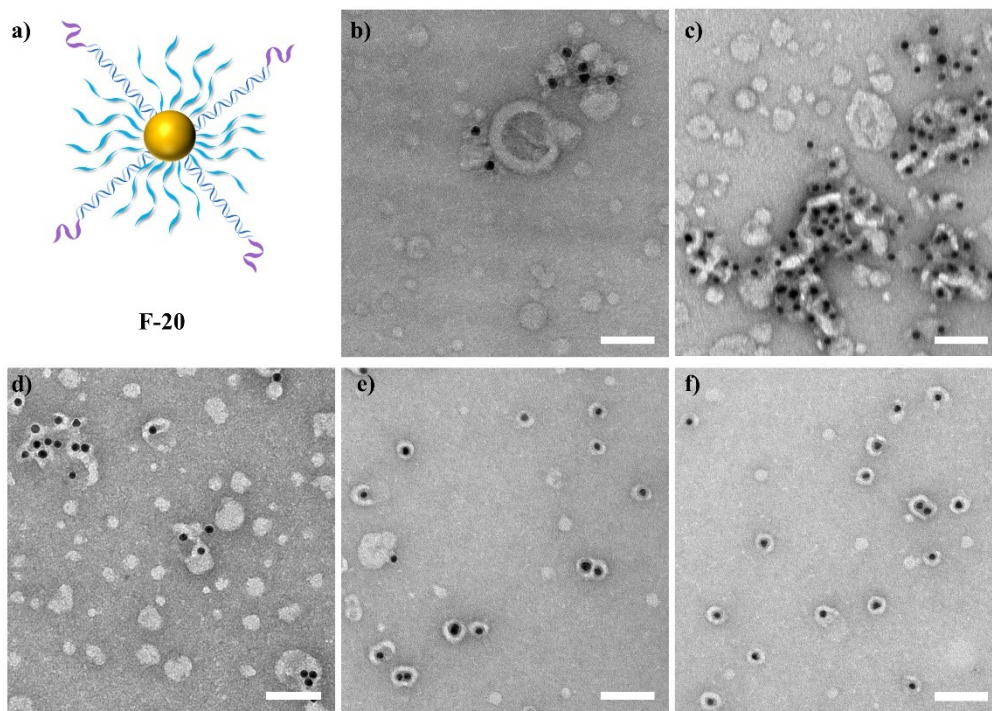

**Fig. S7c** Supplementary assembly results of F-20 under various OG concentration (5% to 1%) in **Fig. 2**.

## 2.7 Agarose Gel Electrophoresis Results of Increased ASO Loading on AuNPs

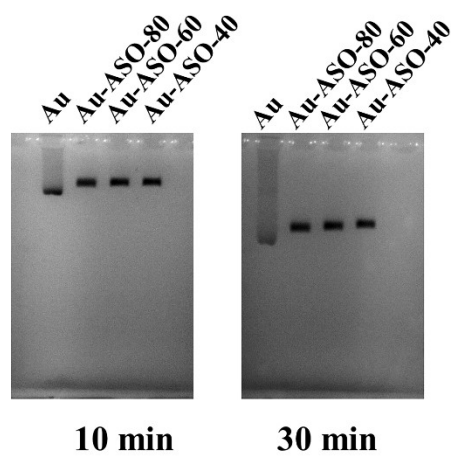

**Fig. S8** The agarose gel electrophoresis results of AuNPs modified with fixed ratio of D23/ASO. It could be observed that when the AuNPs was decorated with higher ratios of the ASO, the reduced migration could be observed, which agreed well with the previous results and indicated that the increased loading of ASO has been achieved.

## 2.8 Measurement Results of ASO Number on AuNPs

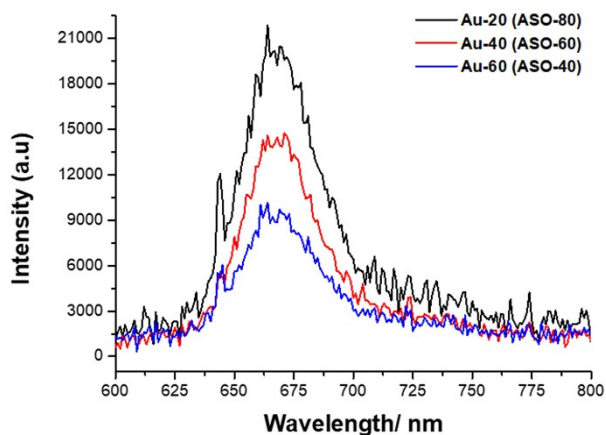

**Fig. S9** The fluorescence spectra of Cy5-cASO released from the AuNPs with increased ASO (ASO-40 to ASO-80) loading after urea-based denaturing. According to the fluorescence spectra, it could be observed that with the increased modification ratio of the ASO (Au-60 to Au-20 or ASO-40 to ASO-80), the increased fluorescence intensity has been recorded, which indicated that the increased loading of nucleic acid drug could be achieved through reducing the LHG density.

**Table S3 Measurement Results of ASO Number on AuNPs**

|                                                     | ASO-80 (Au-20) | ASO-60 (Au-40) | ASO-40 (Au-60) |
|-----------------------------------------------------|----------------|----------------|----------------|
| UV-Vis of AuNPs after urea-denaturing ( $A_{450}$ ) | 1.53           | 1.62           | 1.48           |
| Concentration of AuNPs (nM)                         | 11.0           | 11.6           | 10.6           |
| Intensity of released Cy5 (a.u) at $\lambda_{667}$  | 19220          | 14080          | 8890           |
| Converted molar concentration of Cy5 (nM)           | 1050           | 767            | 494            |
| Ratios of DNA-to-AuNPs                              | 95             | 66             | 45             |

## 2.9 Assembly Results of F-ASO under 1% OG

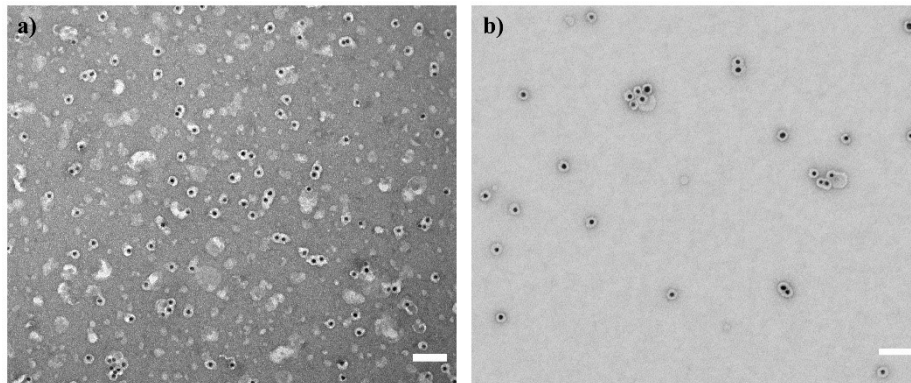

**Fig. S10** The TEM images of assembly results of Au-ASO under 1% OG. (a) TEM image of the FGA-ASO-Lipo without purification. (b) TEM image of the FGA-ASO-Lipo with purification. The scale bar is 100 nm.

## 2.10 TEM Result of Extrusion-based Liposome

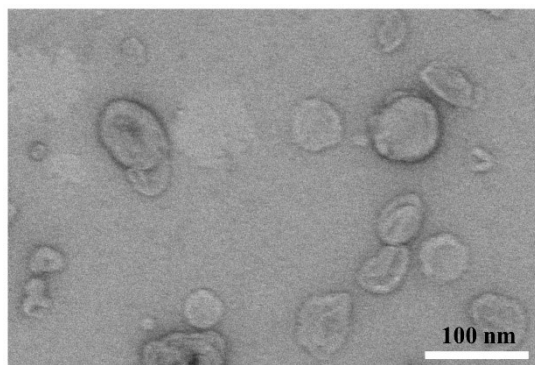

**Fig. S11** The TEM image of assembly result of extrusion-based liposome. The scale bar is 100 nm.

## 2.11 Cell Growth Curves of MCF-7 Treated with Different Formulations

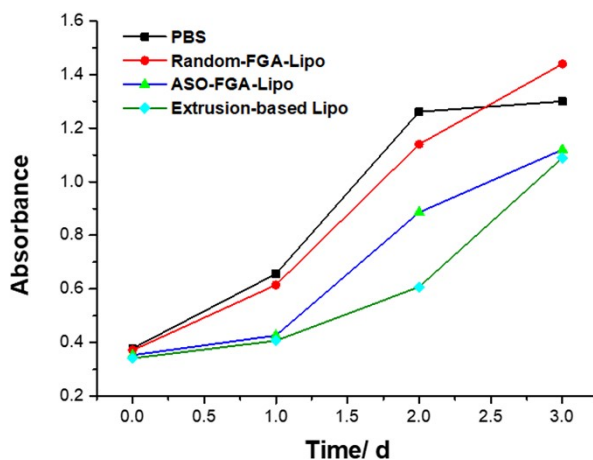

**Fig. S12** The cell growth curves of the MCF-7 cell treated with different formulations (PBS, Random-FGA-Lipo, ASO-FGA-Lipo and Extrusion-based-Lipo, respectively) from 1 d to 3 d. The loading of the ASO delivered by extrusion-based liposomes was conducted as following: the same amount ASO was added to the solution of DOPC/DOPG/PE-PEG-2000 with a final concentration as the FGA process. After extrusion, the free ASO strands were removed through an ultrafiltration tube (100 K, JUNLIBO) by centrifugation at 4500 rpm for 15 min and the procedure was repeated 4 times.



## 2.12 Assembly Result of Den-F under 5% OG

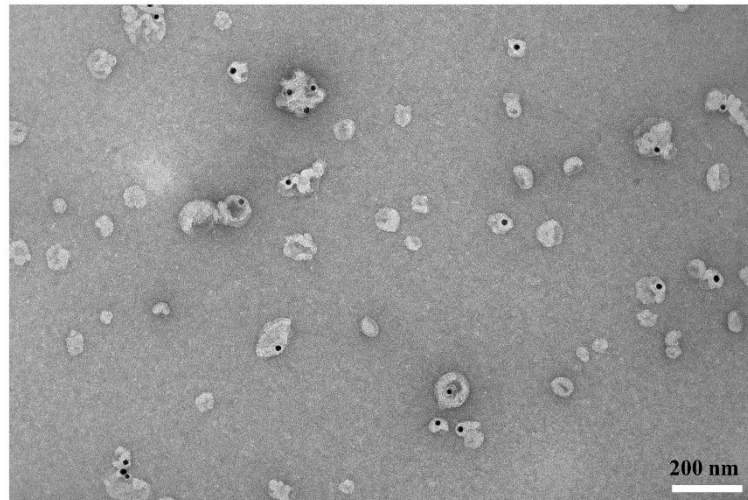

**Fig. S13** The TEM image of assembly result of Den-F under 5% OG. The scale bar is 200 nm.

## 2.13 Related Sequences Information

**Table S4** Peptide, DNA and RNA sequences used in this study

| <b>Name</b>        | <b>Sequences</b>                                                                                     |
|--------------------|------------------------------------------------------------------------------------------------------|
| Azide-Peptide      | Azide-GWARYAEWLFTTPLLLLALALLVEAAEG                                                                   |
| D23                | Thiol-TATCTGTAGGCATAAATTGGTAT                                                                        |
| D12                | Thiol-TTGACCTGTGAA                                                                                   |
| ASO                | Thiol-TCTCCCAGCGTGCGCCAT                                                                             |
| cD23               | Alkynyl-ATACCAATTTATGCCTACAGATA                                                                      |
| L20-Sense-siEGFP   | <b>rUrArUrCrUrGrUrArGrGrCrArUrArArArUrUrGrGrGrArC<br/>rGrUrArArArCrGrGrCrCrArCrArArGrUdTdC-thiol</b> |
| Anti-siEGFP        | <b>rArCrUrUrGrUrGrGrCrCrGrUrUrUrArCrGrUrCdGdC-</b>                                                   |
| Random sense siRNA | <b>rUrArUrArCrCrUrCrUrGrCrCrUrArArUrCrArUrCrUdAdT</b>                                                |
| Random Anti-siRNA  | <b>dTrArGrArUrGrArUrUrArGrGrCrArGrArGrUrUdTdT</b>                                                    |
| Y1c-L20            | <b>CCAATTTATGCCTACAGATAAGGCTGATTTCGGTTCATGC<br/>GGATCCAGAAGCCACTCTGA</b>                             |
| Y1b                | <b>TGGATCCGCATGACATTCGCCGTAAGGAAGCCACTCTGA</b>                                                       |
| Y1a                | <b>CTTACGGCGAATGACCGAATCAGCCT</b>                                                                    |
| cD13               | Alkynyl-TCAGAGTGGCTTC                                                                                |

## 2.14 Synthesis and Characterization of cD23-P

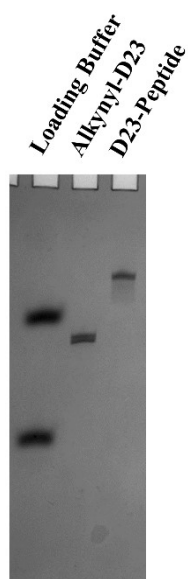

**Fig. S14a** Characterization of cD23-Alkynyl and cD23-Peptide strands by 20% denaturing PAGE.

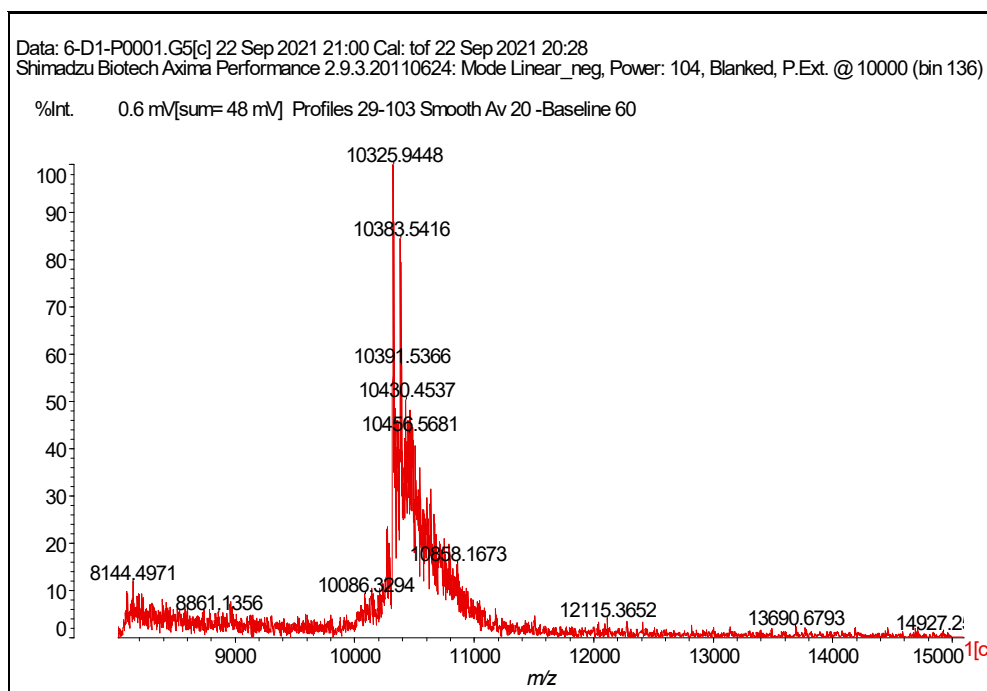

**Fig. S14b** MALDI-TOF characterization of cD23-Peptide conjugate. Based on the mass spectrometry results, it is evident that the observed molecular weight is 10325.9, whereas the anticipated molecular weight is 10321.7, with a minute deviation of 0.4 %. This deviation is well below the acceptable minimum error threshold of 5 %, thereby confirming our triumph in synthesizing the intended product with a precise molecular weight.

## 2.15 Synthesis and Characterization of cD13-P

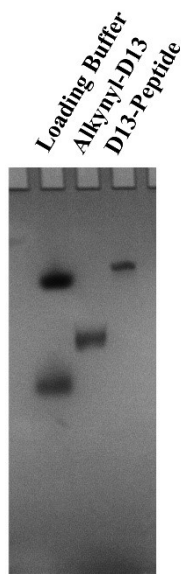

**Fig. S15a** Characterization of cD13-Alkynyl and cD23-Peptide strands by 20% denaturing PAGE.

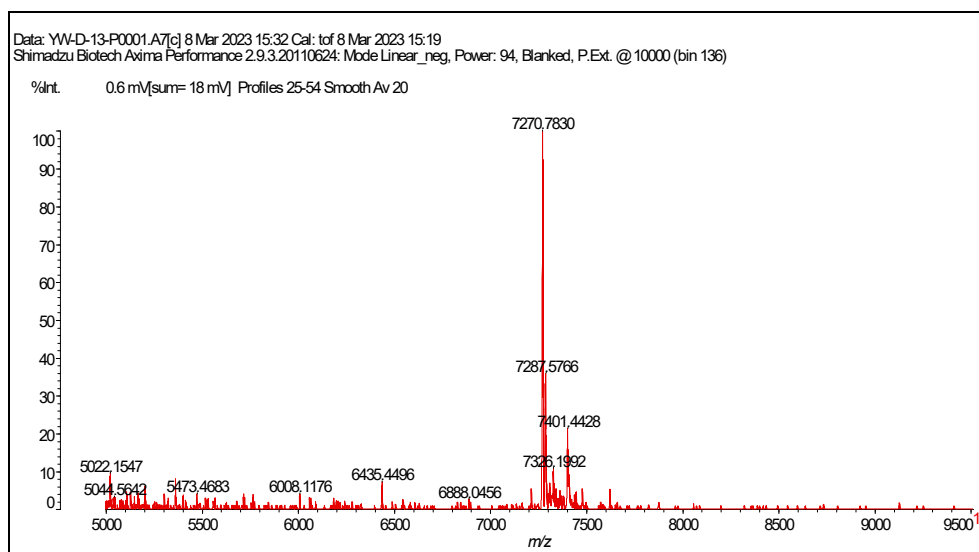

**Fig. S15b** MALDI-TOF characterization of cD13-Peptide conjugate. Based on the mass spectrometry results, it is evident that the observed molecular weight is 7270.8, whereas the anticipated molecular weight is 7298.3, with a minute deviation of 2.8 %. This deviation is well below the acceptable minimum error threshold of 5 %, thereby confirming our triumph in synthesizing the intended product with a precise molecular weight.

## 2.16 Results of hybridization of ds-siEGFP and Y1-dendrimer

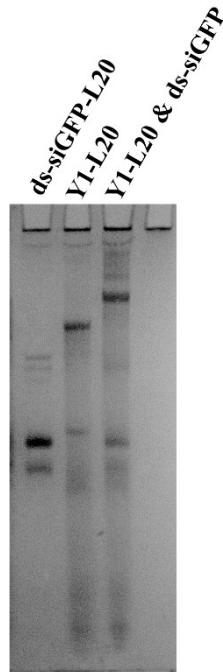

**Fig. S16** The 10% native PAGE analysis of the hybridization of the ds-siEGFP and Y1-dendrimer.

## 2.17 Results of AuNPs modified with Y1-dendrimer

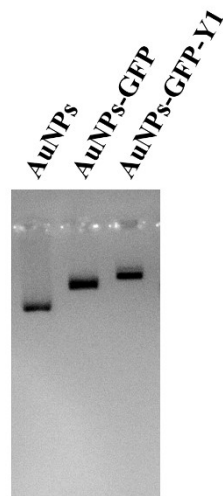

**Fig. S17** The agarose gel electrophoresis results of AuNPs modified with siRNA (siEGFP) and further hybridized with the Y1-dendrimer.

### Reference

S1 W. Haiss, N. T. Thanh, J. Aveyard and D. G. Fernig, *Anal. Chem.*, 2007, **79**, 4215.
